1  
2  
3  
4  
5  
6  
7  
8  
9  
10  
11  
12  
13  
14  
15  
16  
17  
18  
19

**Inferring the presence of aflatoxin-producing *Aspergillus flavus* strains using  
RNA sequencing and electronic probes as a transcriptomic screening tool**

Andres S. Espindola<sup>1,2</sup>, William Schneider<sup>3</sup>, Kitty F. Cardwell<sup>1,2</sup>, Yisel Carrillo<sup>1</sup>, Peter R. Hoyt<sup>3</sup>, Stephen M. Marek<sup>1</sup>, Hassan Melouk<sup>1</sup> and Carla D. Garzon<sup>1</sup>

<sup>1</sup> Department of Entomology and Plant Pathology, Oklahoma State University, Stillwater, Oklahoma, United States of America

<sup>2</sup> National Institute for Microbial Forensics and Food and Agricultural Biosecurity (NIMFFAB), Oklahoma State University, Stillwater, Oklahoma, United States of America

<sup>3</sup> Department of Biochemistry and Molecular Biology, Oklahoma State University, Stillwater, Oklahoma, United States of America

Corresponding Author

E-mail: [andres.espindola@okstate.edu](mailto:andres.espindola@okstate.edu)

## 20 **ABSTRACT**

21 E-probe Diagnostic for Nucleic acid Analysis (EDNA) is a bioinformatic tool originally  
22 developed to detect plant pathogens in metagenomic databases. However,  
23 enhancements made to EDNA increased its capacity to conduct hypothesis directed  
24 detection of specific gene targets present in transcriptomic databases. To target specific  
25 pathogenicity factors used by the pathogen to infect its host or other targets of interest,  
26 e-probes need to be developed for transcripts related to that function. In this study,  
27 EDNA transcriptomics (EDNAtran) was developed to detect the expression of genes  
28 related to aflatoxin production at the transcriptomic level. E-probes were designed from  
29 genes up-regulated during *A. flavus* aflatoxin production. EDNAtran detected gene  
30 transcripts related to aflatoxin production in a transcriptomic database from corn, where  
31 aflatoxin was produced. The results were significantly different from e-probes being  
32 used in the transcriptomic database where aflatoxin was not produced (atoxigenic AF36  
33 strain and toxigenic AF70 in Potato Dextrose Broth).

## 34 **INTRODUCTION**

35 Maize [1], peanuts [2], tree nuts, dried spices [3] and cottonseed [4] are crops that can  
36 be infected during the pre-harvest, post-harvest and/or storage period with *Aspergillus*  
37 *flavus* Link. This fungus produces polyketide secondary metabolites named aflatoxins.  
38 Among the four known aflatoxins (B<sub>1</sub>, B<sub>2</sub>, G<sub>1</sub>, G<sub>2</sub>), B<sub>1</sub> has been of special interest to  
39 food biosecurity due to its toxicity and potent carcinogenic properties [5]. *A. flavus* is a  
40 ubiquitous saprophytic ascomycete fungus grouped in the *Aspergillus* section Flavi,  
41 species with aflatoxin-producing strains including *A. flavus*, *A. parasiticus* and *A. nomius*  
42 [6,7].

43 Aflatoxin is produced through the interaction of approximately 25 genes in a cluster  
44 cascade [8–10]. Regulatory genes for the cluster are *aflR* and *aflS* (*aflJ*), where *aflR*  
45 encodes for a transcriptional factor of the type  $Zn(II)_2Cys_6$  which binds promoter  
46 regions of many aflatoxin genes [11–14]. In contrast, *aflS* (*aflJ*) regulates aflatoxin  
47 production through binding and activating *aflR* [15]. Some strains of *A. flavus* do not  
48 produce aflatoxin and these have been shown to have deletion mutations, identified by  
49 32 separate PCR amplifications [16]. Callicott and Cotty [17] have begun to use cluster  
50 amplification patterns (CAPS) to evaluate *A. flavus* populations based on deletions  
51 genotypes.

52 Aflatoxin contamination in food is highly regulated in multiple countries, consequently  
53 increasing management costs and final product price [18–20]. In the United States  
54 alone, the maximum allowed concentration of aflatoxin in food for human consumption  
55 is 20 ppb, as dictated by the U.S. Food and Drug Administration (FDA). Appropriate  
56 and accurate aflatoxin testing is necessary to opportunistically control *A. flavus* infected  
57 crops. Among the most used techniques for aflatoxin detection and quantification are  
58 thin layer chromatography (TLC), high-performance liquid chromatography (HPLC),  
59 enzyme-linked immunosorbent assay (ELISA) and fluorometry [18], however, there are  
60 limitations in all of these for rapid testing. Industry costs for testing crops for aflatoxins in  
61 the United States alone have ranged from \$30 to \$50 million per year at approximately  
62 at \$10 to \$20 per sample tested [20].

63 A promising management strategy for aflatoxin reduction is inundative biological control  
64 using atoxigenic strains of *A. flavus* (Aflaguard® & AF36) [21–24]. Location or region-  
65 specific indigenous atoxigenic strains are selected to take advantage of inherent fitness

66 in the environment and to avoid potential adaptation problems [25]. The indigenous  
67 isolated atoxigenic strains are multiplied *in vitro*, grown onto a carrier and inoculated on  
68 crop fields with the goal of competitive niche exclusion of the toxigenic strain, by the  
69 atoxigenic strains. The result is the almost complete elimination of aflatoxin  
70 contamination in the crop [21,26]. While the exact mechanism is not understood, a high  
71 prevalence of atoxigenic inoculum results in temporal and physical niche displacement  
72 of the toxigenic strains. Nevertheless, a single year release is not sufficient to render the  
73 field permanently atoxigenic. Thus a yearly application of the biological control agent is  
74 recommended for optimum efficacy [21,24,27].

75 Rapid assessment of determining changing profiles in atoxigenic to toxigenic population  
76 shifts have been lacking. Callicot and Cotty (2015) are attempting to create sensitive  
77 assays with cluster amplification patterns (CAPS), which involves some 32 known  
78 markers, however at this time; the CAP markers are primarily suggested to be a  
79 research technology for understanding dynamics of the atoxigenic populations. Absent  
80 that, current methods for assessing soil toxigenic to atoxigenic ratios of *A. flavus* are  
81 expensive, time, labor and skill intensive. Both, the evaluation of levels of soil *A. flavus*  
82 strain ratios and post-biocontrol screening could be facilitated by new methods. If there  
83 were a sensitive, simple assay for relative toxigenicity, inoculation of the field with  
84 additional atoxigenic strains could be recommended only when empirical tests showing  
85 higher relative toxigenicity reach an action threshold [28].

86 We propose that for practical application, the viability and presence of the toxigenic  
87 strains can be inferred by testing for upregulation of the gene cascade that leads to  
88 presence of aflatoxin. A fast and tentatively less expensive screening tool for toxigenic

89 *A. flavus* strains might be sequencing the whole transcriptome (metatranscriptome) of  
90 the pathogen niche and determining the presence of toxigenic gene up-regulation.  
91 Previously, various approaches have been developed to use metagenomes in ecology  
92 studies and determine the microbial profile of natural ecosystems [29,30]. Yet, few have  
93 focused on the development of tools to detect microbes at the species/isolate level in  
94 agricultural ecosystems [31–33]. However, none of them has addressed the detection of  
95 gene activity and upregulation in agroecosystems. E-probe Diagnostic for Nucleic acid  
96 Analysis (EDNA) was designed to detect viruses, bacteria, fungi and oomycete plant  
97 pathogens by using species-specific markers named e-probes [31,32,34]. Here we  
98 modified EDNA to be used as a gene functional analysis and detection tool to infer the  
99 presence of aflatoxin. EDNA transcriptomics — a modification of the original EDNA's  
100 bioinformatic pipeline — was designed to incorporate genome annotations on the e-  
101 probe design as well as on the detection pipelines. EDNAtran is a theoretical approach  
102 that is being tested for the first time with *A. flavus* and could be extended to detect  
103 metabolic functions associated to pathogenicity in other host-pathogen systems.  
104 Detecting metabolic functions that could potentially lead to plant disease is crucial to  
105 incorporate proper and timely management practices in agroecosystems.

## 106 **MATERIALS AND METHODS**

### 107 ***Fungal isolates and culture methods***

108 *A. flavus* strains were obtained as freeze-dried (AF36; ATCC 96045; atoxigenic) and  
109 frozen (AF70; ATCC MYA-384; toxigenic) cultures from ATCC (Manassas, VA). AF36  
110 was reactivated by rehydration, adding 500  $\mu$ L of sterilized distilled water inside the vial.  
111 Subsequently, 100  $\mu$ L of the re-suspended AF36 was plated on Malt extract agar

112 Blakeslee's formula (MEAbl) and incubated at 31 °C in darkness until mycelium was  
113 developed (72 hours), according to ATCC instructions. AF70 was thawed for 5 minutes,  
114 directly plated onto Malt extract agar, and incubated at 25 °C in darkness until mycelium  
115 was developed (72 hours), according to ATCC instructions. Agar plugs with actively  
116 growing mycelia were re-plated in MEAbl agar and incubated at their optimal  
117 temperatures in the dark until extensive conidial development (5 days) was observed.  
118 The cultures (AF36 and AF70) containing extensive conidia growth were used to  
119 inoculate ground corn and Potato Dextrose Broth (PDB).

120 Corn substrate was prepared using dried corn kernels (*Zea mays*). Kernels were weight  
121 (20g) and ground (using a coffee grinder Mr. Coffee Precision Coffee Grinder IDS77)  
122 until obtaining pieces with the approximate texture of coarse sand (0.5-1mm in  
123 diameter). The coarse grains were autoclaved (dry cycle) for 20 minutes in  
124 polycarbonate containers (Magenta GA-7, Plantmedia, US) and its humidity was  
125 adjusted to keep between 25 – 33% w/v (Modified from Woloshuk, Cavaletto, and  
126 Cleveland 1997).

127 Ground corn kernels and PDB media were inoculated with conidial suspensions  
128 obtained by washing *A. flavus* MEAbl plates with 2 mL of sterile distilled water. Conidia  
129 collected (2 mL) were then added to a single vial containing 4mL of distilled water for a  
130 final dilution of 3:1 v/v (Spore suspension was not quantified). Six mL of spore  
131 suspension was used to inoculate each replicate (20 g of ground corn and PDB). The  
132 ground grain was inoculated with the *A. flavus* suspension in polycarbonate containers  
133 and homogeneously mixed by rolling the containers to allow uniform distribution of the  
134 conidia. Similarly, 250 mL flasks containing 44mL of PDB were inoculated with 6 mL of

135 *A. flavus* spore suspension. The containers and PDB plates were incubated at 31 °C in  
136 the dark for 10 days.

### 137 ***RNA extraction and sequencing***

138 Ground corn kernels inoculated with the AF70 and AF36 strains produced extensive  
139 conidia, which were suspended by gently adding 10 mL of sterilized water to the  
140 magenta containers. The containers were shaken gently to homogenize the spores and  
141 then 1 mL of the spore suspension was obtained and added to a capped 2mL tube  
142 containing silica beads. The conidia cell walls were disrupted by shaking the 2mL tubes  
143 using a bead beater (2 cycles of 20 seconds). The lysate was then transferred (500 µL)  
144 to a column of the Qiagen RNeasy Plant Mini Kit for RNA extraction. On the other hand,  
145 for AF36 and AF70 growing on PDB, mycelia/spores were recovered by filtrating them  
146 using Whatman paper. 100 mg of mycelium/spores were weight and added to a column  
147 of the Qiagen RNeasy Plant Mini Kit to continue with the RNA extraction procedure. The  
148 RNA quality and integrity were assessed using a 2100 Agilent Bioanalyzer (Agilent  
149 Technologies) for 12 RNA extraction samples from AF36 and AF70. A sample (per  
150 strain) having RIN numbers higher than eight were selected for RNA sequencing. After  
151 quality control, RNA was sequenced using the Illumina HiSeq 2500 sequencer at the  
152 Core Facility of the University of Illinois at Urbana-Champaign, IL. The mRNA  
153 sequencing library was created with PolyA capture method per manufacturer's protocol  
154 and the library was sequenced as single-end.

### 155 ***Gene expression analysis***

156 RNA sequencing reads from samples AF70-corn and AF70-PDB were mapped onto the  
157 *A. flavus* AF70 genome using STAR software [36] and bam binary files were

158 transformed from sam files using SAMtools ([http:// samtools.sourceforge.net](http://samtools.sourceforge.net)). Gene  
159 expression analysis was performed with DeSeq2 in R by comparing AF70 growing on  
160 two substrates (corn and PDB). The control was AF70 in PDB (non-conducive for  
161 aflatoxin production), and the treatment was AF70 in corn (conducive for aflatoxin  
162 production) [37]. Positive fold change (up-regulated) genes were selected using the  
163 log2 fold change metric obtained from the DeSeq2 analysis. Upregulated gene  
164 sequences having log2 fold changes greater than five were retrieved by an in-house  
165 Linux bash script and kept in a multi-fasta file for later e-probe design.

### 166 ***E-probe design***

167 The genomes from *A. flavus* AF70 (Accession: JZDT00000000.1) and NRRL3357  
168 (Accession: AAIH00000000.2 ) [38] were obtained from Genbank. Sequences for the  
169 aflatoxin gene cluster of AF70 (AY510453) and AF36 (AY510455) were also retrieved  
170 from GenBank [39]. E-probes 80 nt long were generated using the e-probe pipeline for  
171 EDNAtran (Espindola *et al.*, 2015; Stobbe *et al.*, 2013). The aflatoxin gene cluster of  
172 AF70 was used as target sequence and the same gene cluster for AF36 was used as  
173 near neighbor sequence. E-probe specificity was verified by local alignment of each e-  
174 probes with the intended target genome (AF70) using an stringency of 100% identity  
175 and query coverage. Metadata information about the gene where it belongs was also  
176 retrieved by the EDNAtran e-probe design pipeline. E-probe annotation was utilized to  
177 select e-probes that belonged only to the up-regulated genes previously identified with  
178 DeSeq2.



179 ***Rapid assessment of active aflatoxin metabolic pathway using EDNAtran***

180 EDNAtran was utilized with default parameters (percent identity and query coverage of  
181 100%) to assess four transcriptomic databases (**Table 1**) which included toxigenic  
182 (AF70) and atoxigenic (AF36) *A. flavus* strains growing in conducive (ground corn) and  
183 non-conductive (PDB) environment for aflatoxin production. E-probes designed in up-  
184 regulated genes of the aflatoxin gene cluster of AF70 was utilized during this analysis.  
185 Hit frequencies of raw reads with e-probes were recorded for each of the four  
186 treatments. Data on hit frequencies were analyzed for variance by ANOVA. For  
187 analysis of significant differences between hit frequencies, Tukey's HSD test and T-test  
188 at P=0.05 were used.

189 **RESULTS**

190 ***Assessing appropriate growing conditions for the production of aflatoxin***

191 The isolates of *A. flavus* AF70 and AF36 showed different growth patterns and  
192 morphology on the different media (PDB and ground corn). Aflatoxin production is  
193 directly correlated with concentrations of free saccharides [40–43]; therefore AF70 and  
194 AF36 were grown in a toxin-inducing substrate (ground corn) and non-toxin inducing  
195 media (PDB). Free saccharides (glucose, sucrose, raffinose, etc) are localized in the  
196 germ of the corn grain when matured non-germinated seeds; however, in germinating  
197 corn, the endosperm is used as a source of saccharides [44]. Increased sclerotia  
198 production was observed in AF70, in contrast, AF36 produced conidia in all media.  
199 However, AF70 produced conidia 10 days post inoculation in corn.

200 **RNA sequencing and Gene expression analysis**

201 RNA extracted from AF36 and AF70 strains grown on PDB and ground corn yielded  
202 from 20 to 24,9 million reads per sequencing run (**Table 1**). The sequenced reads then  
203 were mapped to the *A. flavus* AF70 strain genome to retrieve information about  
204 potential up-regulation and down-regulation of genes by using STAR [36] and DESeq2.  
205 In total, 44 genes were identified as up-regulated and 129 genes were down-regulated  
206 in the *A. flavus* genome (*Error! Reference source not found.* **Table**). Identified as part of  
207 the aflatoxin gene cluster, only 17 out of 44 upregulated genes. From two to six gene  
208 fold changes were plotted in a hierarchical clustering heat map as well as in a MAPlot  
209 (**Fig 1 Fig 2**).

210 **Fig 1. Mean Average Plot for RNA sequencing gene expression analysis. Red line**  
211 **shows zero change in gene expression.** Blue dashed lines show no change in gene  
212 expression and green dashed lines show a five-fold change in gene expression. Red  
213 dots are genes that have been either up-regulated or down-regulated in *A. flavus* AF70  
214 infecting ground corn. Gray dots depict genes that have not had enough statistical  
215 evidence to be assigned a gene expression fold change.

216 **Fig 2. Hierarchical clustering map depicting *A. flavus* AF70 growing on PDA and**  
217 **ground corn.** Gene expression fold change is differentiated by a color palette ranging  
218 from red (most up-regulated genes have plus six-fold changes) to blue (most down-  
219 regulated genes have minus six-fold change). Genes are clustered based on their  
220 gene expression fold change to facilitate gene co-expression analysis.

221

## 222 ***E-probe generation for aflatoxin detection***

223 In total, 231 highly specific e-probes were generated to detect the production of  
224 aflatoxin specifically for AF70. AF36 genome-wide e-probes were not generated  
225 because there is not a genome sequence available yet for that specific strain.

## 226 ***Detecting aflatoxin production using EDNAtran in *A. flavus****

227 As expected, 231 e-probes had hits creating High-Quality Matches (HQMs) in AF70-  
228 corn transcriptome datasets; meanwhile, AF70-PDB had only 39 HQMs (**Fig 3**). AF36-  
229 corn had only two HQMs and AF36-PDB had 12 HQMs (**Table 1**). EDNAtran  
230 discriminated between the transcriptomic databases with abundant aflatoxin production  
231 and the transcriptomes from low-toxin production based on EDNA eukaryotic metrics  
232 [32] (**Table 1**). However, to infer the presence of aflatoxin we can only use frequencies  
233 of hits as an indirect measure. In this case, the number of times a read was mapped to  
234 an e-probe was recorded and counted without any limits. A dot plot of alignment length  
235 vs. percent identity with marginal hit frequencies facilitates visualizing hit frequencies.  
236 Specifically for *A. flavus* AF70 in corn, it was observable that the hit frequencies were  
237 very high — around 9,000 hits per e-probe — when the alignments are above 90%  
238 identity and the alignment length was approaching to the total length of the e-probe (**Fig**  
239 **3A**). Conversely, for AF70 in PDB and AF36, the marginal plots show a low frequency  
240 of hits when alignment lengths and percent identities were above the threshold of 35nt  
241 and 90% respectively (**Fig 3B-3D**). Frequencies of hit values were square root  
242 converted and statistically analyzed with ANOVA to compare all the samples/treatments  
243 (**Fig 4**).

244 **Fig 3. EDNA transcriptomics hits distribution and frequencies for *A. flavus***  
 245 **aflatoxin detection.** (A and C) RNA sequencing of *A. flavus* AF70 and AF36  
 246 respectively growing on corn identified with 80-mer AF70 aflatoxin-specific e-probes. (B  
 247 and D). RNA sequencing of *A. flavus* AF70 and AF36 respectively growing on PDB.

248 **Fig 4. Hit frequencies of AF70 e-probes in RNA sequencing databases of *A.***  
 249 ***flavus*.** Atoxigenic strain of *A. flavus* AF36 growing on both PDB and Corn. Similarly,  
 250 the toxigenic strain of *A. flavus* AF70 growing on PDB and Corn. Differences in gene  
 251 expression levels are directly correlated to hit frequencies.

252 **Table 1. EDNA transcriptomics output table for the inference of aflatoxin in *A.***  
 253 ***flavus*.**

| Culture           | Total reads | ARL  | LRL | MRL | Probe length | TNP | HQM |      |      |
|-------------------|-------------|------|-----|-----|--------------|-----|-----|------|------|
|                   |             |      |     |     |              |     | Ev  | NoEv | HSGM |
| AF70 <sup>a</sup> | 20657024    | 98.9 | 100 | 35  | 80           | 231 | 39  | 40   | 39   |
| AF36 <sup>b</sup> | 22495368    | 99.0 | 100 | 35  | 80           | 231 | 2   | 2    | 2    |
| AF36 <sup>a</sup> | 24134226    | 98.7 | 100 | 35  | 80           | 231 | 12  | 12   | 12   |
| AF70 <sup>b</sup> | 24902500    | 98.9 | 100 | 35  | 80           | 231 | 231 | 231  | 231  |

254 ARL, average read length; LRL, largest read length; MRL, minimum read length; TNP,  
 255 total number of probes; HQM, high-quality matches; Ev, matches include e-value in the  
 256 scoring method; NoEv, matches do not include e-value in the scoring method; HSGM,  
 257 high scoring general matches.

258 <sup>a</sup>*A. flavus* strain growing on PDB.

259 <sup>b</sup>*A. flavus* strain growing on ground corn.

260

261 The ANOVA in the *A. flavus* experiment had a p-value lower than 0.05 which rejects the  
 262 null hypotheses (all hit frequencies are equal); therefore, a post-hoc analysis was

263 automatically performed using the Tukey HSD function in R. The post-hoc analysis and  
264 T-test for *A. flavus* showed that e-probes hitting on RNA sequencing databases  
265 obtained from *A. flavus* AF70 growing on ground corn were different from those of AF70  
266 growing on PDB, and AF36 on corn and PDB (**Fig. 5** and **Table 2**). In conclusion,  
267 EDNAtran was able to find statistically significant differences between the transcriptomic  
268 data set of the highly toxigenic sample, from the non-toxigenic samples, using 231 e-  
269 probes generated in this study.

270 **Fig. 5.** Post-hoc analysis of ANOVA using Tukey HSD with 95% of confidence for the  
271 inference of aflatoxin transcriptional activation. Lines close to zero are interactions that  
272 had no difference in their hit frequency means while lines closer to 30 are interactions  
273 that had different hit frequency means.

274 **Table 2.** Pairwise T-test p-values comparing e-probe hit frequencies for *A. flavus* toxin  
275 detection analysis using the aflatoxin e-probes.

|           | AF36-Corn         | AF36-PDB          | AF70-Corn         |
|-----------|-------------------|-------------------|-------------------|
| AF36-PDB  | 1                 | NA                | NA                |
| AF70-Corn | <b>3.72E-222*</b> | <b>8.38E-221*</b> | NA                |
| AF70-PDB  | 1                 | 1                 | <b>1.04E-220*</b> |

276 \*Comparisons having p-values lower than 0.05 are considered significant.

## 277 DISCUSSION

278 EDNA has previously been proven to successfully detect a variety of plant pathogens  
279 from raw metagenomic databases [32,34,45]. DNA as the main source of identification  
280 has always been the gold standard for detecting organisms in a sample, although  
281 viability is not assessed. Therefore, the question about “dead or alive” is left  
282 undetermined unless the organism is isolated and cultured, or, transcriptome analysis is

283 used as a complementary detection tool or, complementary molecular viability analysis  
284 is included [46].

285 Inspectors at international ports require a rapid detection method when decisions need  
286 to be done on site. EDNA has been considered a good candidate to be used as a  
287 diagnostic tool in ports of entry, due to its multiplexing capacity and rapidness. Yet,  
288 EDNA does not include an analysis of pathogen viability. If DNA-based detection  
289 (metagenomic analysis) is positive and viability needs to be addressed, the use of  
290 additional tests is not a viable approach for perishable or time-sensitive shipments.  
291 Using RNA sequencing and relative quantification of active genes is ideal to infer the  
292 viability of plant pathogens. The use of EDNA transcriptomics to infer the production of  
293 aflatoxin is a first attempt to introduce a novel strategy by using new sequencing  
294 technologies to identify viable plant pathogens. The use of e-probes that are designed  
295 on up-regulated genes incorporates an advantage to EDNA transcriptomics over other  
296 tools that use RNA sequencing to assess gene expression [37]. The advantage of  
297 EDNA transcriptomics over other methods of transcript frequency inference and  
298 calculation is that the time-consuming map against the reference genome is not  
299 necessary. Instead, we align the sample reads to the highly specific e-probes, which are  
300 designed for known up-regulated genes. Directing the analysis to genes that are known  
301 to be up-regulated reduces the analysis time tremendously since a mapping against a  
302 whole genome is no longer necessary. Where needed total nucleic acids (DNA and  
303 RNA) can be extracted from the sample of interest to perform both pathogen detection  
304 and gene activity.

305 Although most of the potential controlled inputs must be maintained constant, the  
306 sample matrix could contain fungal biomass, spores or sclerotia, depending on the  
307 organism and its life cycle stage. Yet, the source of relative quantitation become  
308 irrelevant because gene-expression analysis tools (including DeSeq.) are developed to  
309 analyze bulk populations — containing millions of cells —. Consequently, cell number  
310 differences between the treatment (Corn+AF70) and control (PDB+AF70) are small-  
311 uncontrolled inputs when equivalent sequencing depth has been achieved. Different  
312 cell counts between the treatment and the control in gene expression studies is  
313 therefore not a factor. We intend to use EDNA transcriptomics in metatranscriptomic  
314 analyses, where cell counts of organisms is difficult (or impossible i.e. unculturable-  
315 unknown organisms). Therefore, EDNAtran relies on a good quality sequencing data  
316 and equivalent sequencing depth to be able to differentiate between high and low-  
317 frequency hits.

318 The use of replicates in gene expression analyses using NGS are crucial, yet, this study  
319 used one replicate for all four RNA sequencing samples. In a real case scenario —  
320 where soil samples potentially containing *A. flavus* are collected — obtaining high-  
321 quality RNA libraries is more important than replicates. This study produced twelve  
322 RNA extraction samples from which four RNA extractions having the highest RNA  
323 integrity and quality ( $RIN \geq 8$ ) were selected to be sequenced. Replication may be  
324 needed for statistical hypothesis-driven research, but it is not required for  
325 presence/absence queries or for the development of e-probes. Sequencing depth and  
326 sequencing quality equivalence are the most important metric for diagnosis.

327 Future studies need to include multiple blind samples to assess the usefulness of the  
328 new EDNAtran protocol to indicate the presence of aflatoxin-producing *A. flavus*. In this  
329 study, we have shown that in a known positive transcriptomic database, EDNAtran is  
330 capable of discriminating between production and no-production of aflatoxin. However,  
331 blind samples will provide a realistic assessment of the tool.

### 332 **ACKNOWLEDGMENTS**

333 This work was supported by the USDA-CSREES Plant Biosecurity Program, grant  
334 number 2010-85605-20542. Portions of the computing for this project was performed at  
335 the OSU High-Performance Computing Center at Oklahoma State University supported  
336 in part through the National Science Foundation grant OCI-1126330.

### 337 **LITERATURE CITED**

- 338 1. Marsh SF, Payne G a. Preharvest Infection of Corn Silks and Kernels by  
339 *Aspergillus flavus* [Internet]. Vol. 74, Phytopathology. 1984. p. 1284–9.
- 340 2. Hill RA, Blankenship PD, Cole RJ, Sanders TH. Effects of soil moisture and  
341 temperature on preharvest invasion of peanuts by the *Aspergillus flavus* group  
342 and subsequent aflatoxin development. *Appl Environ Microbiol.* 1983;45(2):628–  
343 33.
- 344 3. Llewellyn GC, Mooney RL, Cheatle TF, Flannigan B. Mycotoxin contamination of  
345 spices : An update. *Int Biodeterior Biodegradation.* 1992;29(2):111–21.
- 346 4. Cotty PJ. Aflatoxin-producing potential of communities of *Aspergillus* section *Flavi*  
347 from cotton producing areas in the United States. *Mycol Res.* 1997;101(6):698–  
348 704.



- 349 5. Squire RA. Ranking animal carcinogens: a proposed regulatory approach. *Sci* .  
350 1981 Nov 20;214(4523):877–80.
- 351 6. Klich M a., Pitt JI. Differentiation of *Aspergillus flavus* from *A. parasiticus* and  
352 other closely related species. *Trans Br Mycol Soc*. 1988;91(1):99–108.
- 353 7. Kurtzman CP, Horn BW, Hesselstine CW. *Aspergillus nomius*, a new aflatoxin-  
354 producing species related to *Aspergillus flavus* and *Aspergillus tamarii*. *Antonie*  
355 *Van Leeuwenhoek*. 1987;53(3):147–58.
- 356 8. Trail F, Mahanti N, Rarick M, Mehigh R, Liang SH, Zhou R, et al. Physical and  
357 transcriptional map of an aflatoxin gene cluster in *Aspergillus parasiticus* and  
358 functional disruption of a gene involved early in the aflatoxin pathway. *Appl*  
359 *Environ Microbiol*. 1995;61(7):2665–73.
- 360 9. Yu JJ, Chang PK, Cary JW, Wright M, Bhatnagar D, Cleveland TE, et al.  
361 Comparative Mapping of Aflatoxin Pathway Gene Clusters in *Aspergillus-*  
362 *Parasiticus* and *Aspergillus-Flavus*. *Appl Environ Microbiol*. 1995;61(6):2365–71.
- 363 10. Minto RE, Townsend CA. Enzymology and Molecular Biology of Aflatoxin  
364 Biosynthesis. *Chem Rev*. 1997 Nov 1;97(7):2537–56.
- 365 11. Fernandes M, Keller NP, Adams TH. Sequence-specific binding by *Aspergillus*  
366 *nidulans* AflR, a C6 zinc cluster protein regulating mycotoxin biosynthesis. *Mol*  
367 *Microbiol*. 1998;28(6):1355–65.
- 368 12. Woloshuk CP, Foutz KR, Brewer JF, Bhatnagar D, Cleveland TE, Payne GA.  
369 Molecular characterization of aflR, a regulatory locus for aflatoxin biosynthesis.

- 370 Appl Environ Microbiol. 1994;60(7):2408–14.
- 371 13. Chang PK, Cary JW, Bhatnagar D, Cleveland TE, Bennett JW, Linz JE, et al.  
372 Cloning of the *Aspergillus parasiticus* *apa-2* gene associated with the regulation of  
373 aflatoxin biosynthesis. Appl Environ Microbiol. 1993;59(10):3273–9.
- 374 14. Yu JH, Butchko R a E, Fernandes M, Keller NP, Leonard TJ, Adams TH.  
375 Conservation of structure and function of the aflatoxin regulatory gene *aflR* from  
376 *Aspergillus nidulans* and *A. flavus*. Curr Genet. 1996;29(6):549–55.
- 377 15. Chang PK. Lack of interaction between *AFLR* and *AFLJ* contributes to  
378 nonaflatoxicity of *Aspergillus sojae*. J Biotechnol. 2004;107(3):245–53.
- 379 16. Chang PK, Horn BW, Dorner JW. Sequence breakpoints in the aflatoxin  
380 biosynthesis gene cluster and flanking regions in nonaflatoxic *Aspergillus*  
381 *flavus* isolates. Fungal Genet Biol. 2005;42(11):914–23.
- 382 17. Callicott K a., Cotty PJ. Method for monitoring deletions in the aflatoxin  
383 biosynthesis gene cluster of *Aspergillus flavus* with multiplex PCR. Lett Appl  
384 Microbiol. 2015;60(1):60–5.
- 385 18. Van Egmond HP, Schothorst RC, Jonker M a. Regulations relating to mycotoxins  
386 in food: Perspectives in a global and European context. Anal Bioanal Chem.  
387 2007;389(1):147–57.
- 388 19. Wu F, Liu Y, Bhatnagar D. Cost-Effectiveness of aflatoxin control methods:  
389 economic incentives. 2008;9543(November):203–25.
- 390 20. Robens J, Cardwell K. The Costs of Mycotoxin Management to the USA:

- 391 Management of Aflatoxins in the United States. *Toxin Rev.* 2003;22(2–3):139–52.
- 392 21. Atehnkeng J, Ojiambo PS, Donner M, Ikotun T, Sikora RA, Cotty PJ, et al.  
393 Distribution and toxigenicity of *Aspergillus* species isolated from maize kernels  
394 from three agro-ecological zones in Nigeria. *Int J Food Microbiol.* 2008;122(1):74–  
395 84.
- 396 22. Garber RK, Cotty PJ. Formation of Sclerotia and Aflatoxins in Developing Cotton  
397 Bolls Infected by the S Strain of *Aspergillus flavus* and Potential for Biocontrol  
398 with an Atoxigenic Strain. *Phytopathology.* 1997;87(9):940–5.
- 399 23. Probst C, Bandyopadhyay R, Price LE, Cotty PJ. Identification of Atoxigenic  
400 *Aspergillus flavus* Isolates to Reduce Aflatoxin Contamination of maize in Kenya.  
401 *Plant Dis.* 2011;95(2):212–8.
- 402 24. Bandyopadhyay R, Ortega-Beltran A, Akande A, Mutegei C, Atehnkeng J, Kaptoge  
403 L, et al. Biological control of aflatoxins in Africa: current status and potential  
404 challenges in the face of climate change. *World Mycotoxin J.* 2016;9(5):771–89.
- 405 25. Mehl HL, Jaime R, Callicott K a., Probst C, Garber NP, Ortega-Beltran A, et al.  
406 *Aspergillus flavus* diversity on crops and in the environment can be exploited to  
407 reduce aflatoxin exposure and improve health. *Ann N Y Acad Sci.*  
408 2012;1273(1):7–17.
- 409 26. Cotty PJ. Influence of field application of an atoxigenic strains of *Aspergillus*  
410 *flavus* on the populations of *A. flavus* infection cotton balls and on the aflatoxin  
411 content of cottonseed. Vol. 84, *Phytopathology.* 1994. p. 1270–7.

- 412 27. Cotty PJ, Mellon JE. Ecology of aflatoxin producing fungi and biocontrol of  
413 aflatoxin contamination. *Mycotoxin Res.* 2006;22(2):110–7.
- 414 28. Mauro A, Battilani P, Cotty PJ. Atoxigenic *Aspergillus flavus* endemic to Italy for  
415 biocontrol of aflatoxins in maize. *BioControl.* 2015;60(1):125–34.
- 416 29. Huson DH, Mitra S, Ruscheweyh H-J, Weber N, Schuster SC. Integrative analysis  
417 of environmental sequences using MEGAN4. *Genome Res.* 2011;21(9):1552–60.
- 418 30. Truong DT, Franzosa E a, Tickle TL, Scholz M, Weingart G, Pasolli E, et al.  
419 MetaPhlan2 for enhanced metagenomic taxonomic profiling. *Nat Methods.*  
420 2015;12(10):902–3.
- 421 31. Stobbe AH, Daniels J, Espindola AS, Verma R, Melcher U, Ochoa-Corona F, et  
422 al. E-probe Diagnostic Nucleic acid Analysis (EDNA): A theoretical approach for  
423 handling of next generation sequencing data for diagnostics. *Microbiol Methods.*  
424 2013;94:356–66.
- 425 32. Espindola AS, Garzon CD, Schneider WL, Hoyt PR, Marek SM, Garzon CD. A  
426 new approach for detecting Fungal and Oomycete plant pathogens in Next  
427 Generation Sequencing metagenome data utilizing Electronic Probes. *Int J Data*  
428 *Min Bioinformatics.* 2015 May 18;12(2):115–28.
- 429 33. Visser M, Burger JT, Maree HJ. Targeted virus detection in next-generation  
430 sequencing data using an automated e-probe based approach. *Virology.*  
431 2016;495:122–8.
- 432 34. Blagden T, Schneider W, Melcher U, Daniels J, Fletcher J. Adaptation and

- 433 Validation of E-Probe Diagnostic Nucleic Acid Analysis for Detection of  
434 *Escherichia coli* O157:H7 in Metagenomic Data from Complex Food Matrices. *J*  
435 *Food Prot.* 2016;79(4):574–81.
- 436 35. Woloshuk CP, Cavaletto JR, Cleveland TE. Inducers of Aflatoxin Biosynthesis  
437 from Colonized Maize Kernels Are Generated by an Amylase Activity from  
438 *Aspergillus flavus*. *Phytopathology.* 1997;87(2):164–9.
- 439 36. Dobin A, Davis CA, Schlesinger F, Drenkow J, Zaleski C, Jha S, et al. STAR:  
440 ultrafast universal RNA-seq aligner. *Bioinformatics.* 2013;29(1):15–21.
- 441 37. Anders S, Huber W. Differential expression analysis for sequence count data.  
442 *Genome Biol.* 2010;11(10):1–12.
- 443 38. Nierman WC, Yu J, Fedorova-Abrams ND, Losada L, Cleveland TE, Bhatnagar D,  
444 et al. Genome Sequence of *Aspergillus flavus* NRRL 3357, a Strain That Causes  
445 Aflatoxin Contamination of Food and Feed. *Genome Announc.* 2015;3(2):e00168-  
446 15.
- 447 39. Ehrlich KC, Yu J, Cotty PJ. Aflatoxin biosynthesis gene clusters and flanking  
448 regions. *J Appl Microbiol.* 2005;99(3):518–27.
- 449 40. Davis ND, Diener UL, Eldridge DW. Production of aflatoxins B1 and G1 by  
450 *Aspergillus flavus* in a semisynthetic medium. *Appl Microbiol.* 1966;14(3):378–80.
- 451 41. Mateles RI, Adye JC. Production of Aflatoxins in Submerged Culture. *Appl*  
452 *Microbiol.* 1965;13(2):208–11.
- 453 42. Mellon JE, Dowd MK, Cotty PJ. Substrate utilization by *Aspergillus flavus* in

- 454 inoculated whole corn kernels and isolated tissues. J Agric Food Chem.  
455 2005;53:2351–7.
- 456 43. Probst C, Cotty PJ. Relationships between in vivo and in vitro aflatoxin  
457 production: Reliable prediction of fungal ability to contaminate maize with  
458 aflatoxins. Fungal Biol. 2012;116(4):503–10.
- 459 44. Keller N, Butchko AE, Sarr B, Phillips T. A visual pattern of mycotoxin production  
460 in maize kernels by *Aspergillus* spp. Phytopathology. 1994;84:483–8.
- 461 45. Stobbe AH, Schneider WL, Hoyt PR, Melcher U. Screening Metagenomic Data for  
462 Viruses Using the E-Probe Diagnostic Nucleic Acid Assay. Phytopathology. 2014  
463 Sep 10;104(10):1125–9.
- 464 46. Cangelosi GA, Meschke JS. Dead or Alive: Molecular Assessment of Microbial  
465 Viability. Appl Environ Microbiol. 2014;80(19):5884–91.

466

## 467 **SUPPORTING INFORMATION**

468 **S1 Table. Expression values (log<sub>2</sub> fold Change) for AF70 *A. flavus* strain for two**  
469 **culture conditions (ground corn and PDB). For each Gene ID, expression levels are**  
470 listed along with p-values.
